# Supplementary material for: What factors affect evidence-informed policymaking in public health? Protocol for a systematic review of qualitative evidence using thematic synthesis
Source: Springer Nature journal article supplement (doi:10.1186/s13643-016-0240-6), 2016-04-14
Supplement: MOESM2 [file 10028334]

**Assessment of study quality – Adapted CASP form**

Reviewer: \_\_\_\_\_ Date: \_\_\_\_\_

Author: \_\_\_\_\_ Year: \_\_\_\_\_ Record Number: \_\_\_\_\_

| Assessment questions                                                                                                                  | Response (circle) |    |         |
|---------------------------------------------------------------------------------------------------------------------------------------|-------------------|----|---------|
| 1. Was there a clear statement of the research question(s) and/or the aim(s) of the research?                                         | Yes               | No | Unclear |
| 2. Was a qualitative approach appropriate?                                                                                            | Yes               | No | Unclear |
| 3. Were the research methodology and design appropriate for addressing the research question?                                         | Yes               | No | Unclear |
| 4. Was the sampling/recruitment strategy appropriate for addressing the research question?                                            | Yes               | No | Unclear |
| 5. Were the methods of data collection appropriate for addressing the research question?                                              | Yes               | No | Unclear |
| 6. Were the data analysis methods sufficiently rigorous and appropriate for addressing the research question?                         | Yes               | No | Unclear |
| 7. Is there a statement locating the researcher(s) culturally and/or theoretically?*                                                  | Yes               | No | Unclear |
| 8. Has the relationship between researcher and participants been adequately considered?*                                              | Yes               | No | Unclear |
| 9. Are the participants and their voices adequately represented?*                                                                     | Yes               | No | Unclear |
| 10. Have ethical issues been adequately taken into consideration, and is there evidence of ethical approval from an appropriate body? | Yes               | No | Unclear |
| 11. Is there a clear statement of findings?                                                                                           | Yes               | No | Unclear |
| 12. Do the conclusions drawn in the research report flow from the analysis, or interpretation, of the data?*                          | Yes               | No | Unclear |

\*Item adapted from JBI-QARI qualitative critical appraisal instrument

Overall methodological rating (circle): **High**      **Moderate**      **Low**

Rationale and comments: \_\_\_\_\_  
 \_\_\_\_\_  
 \_\_\_\_\_  
 \_\_\_\_\_  
 \_\_\_\_\_
